## Correction

# Correction: Mass Spectrometric Identification of Ancient Proteins as Potential Molecular Biomarkers for a 2000-Year-Old Osteogenic Sarcoma

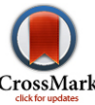**The PLOS ONE Staff**

There are several errors in Figure 4. The authors have provided a corrected version of Figure 4 below.

**Citation:** The PLOS ONE Staff (2014) Correction: Mass Spectrometric Identification of Ancient Proteins as Potential Molecular Biomarkers for a 2000-Year-Old Osteogenic Sarcoma. PLoS ONE 9(7): e103862. doi:10.1371/journal.pone.0103862

**Published:** July 24, 2014

**Copyright:** © 2014 The PLOS ONE Staff. This is an open-access article distributed under the terms of the Creative Commons Attribution License, which permits unrestricted use, distribution, and reproduction in any medium, provided the original author and source are credited.

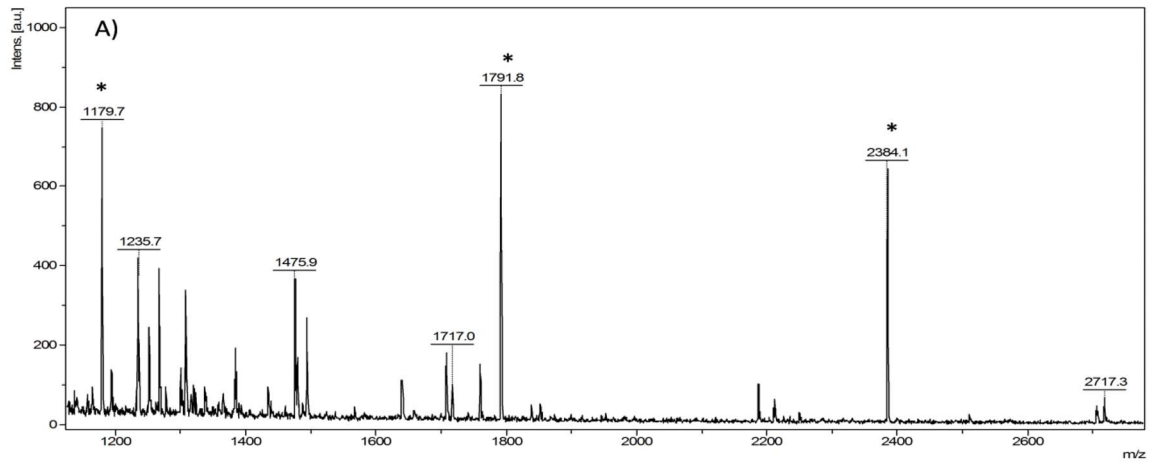

| Position | Molecular mass (Da) | Sequence                | MS/MS | Modification  |
|----------|---------------------|-------------------------|-------|---------------|
| 81-103   | 2717.24             | DVMAGLMYPPPLYDAHELWHAMK |       |               |
| 193-202  | 1194.69             | TMLQMILCNK              | +     |               |
| 193-202  | 1251.68             | TMLQMILCNK              |       | CAM(C)        |
| 193-202  | 1267.72             | TMLQMILCNK              |       | CAM(C)+ OX(M) |
| 212-227  | 1760.66             | QEFQNISGQDMVDAIN        |       |               |
| 233-243  | 1234.78             | VDAINECYDGY             |       |               |
| 293-302  | 1235.60             | YGKSLFHDR               | +     |               |
| 296-310  | 1791.73             | SLFHDIRNFASGHYK         |       |               |
| 311-324  | 1716.95             | KALLAICAGDAEDY          | +     |               |
| 313-324  | 1475.87             | LLAICAGDAEDY            | +     |               |

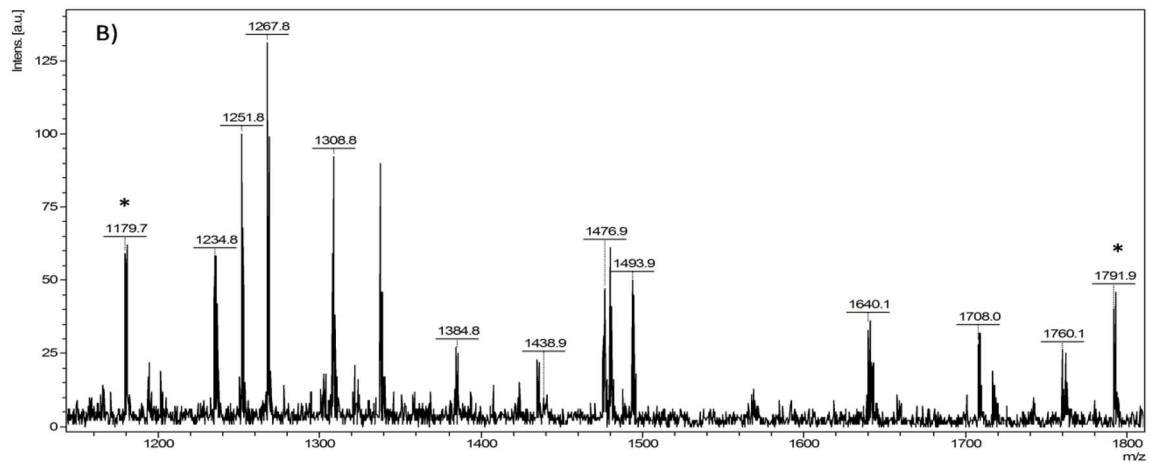

| Position | Molecular mass (Da) | Sequence     | MS/MS | Modification  |
|----------|---------------------|--------------|-------|---------------|
| 3-14     | 1639.91             | NCFRLQEEMLQR | +     | CAM(C)+ OX(M) |
| 15-25    | 1323.66             | EEAENTLQSFR  |       |               |
| 89-100   | 1393.71             | DVRQQYESVAAK |       |               |
| 111-122  | 1308.64             | SKFADLSEAANR | +     |               |
| 209-220  | 1439.79             | MALDIEIATYRK |       | OX (M)        |
| 220-228  | 1060.63             | KLLEGESR     |       |               |

**Figure 4. Representative mass spectra and the list of the identified tryptic peptides of two identified tumor biomarkers.** A) Annexin A10, B) Vimentin. Some keratin contamination has been detected in the sample, the tryptic peptides of keratin were used as internal calibration standards and the peaks are marked with asterisk. The used abbreviations: CAM - carbamidomethylation of cysteine, OX - oxidation of methionine. doi:10.1371/journal.pone.0087215.g004

## Reference

1. Bona A, Papai Z, Maasz G, Toth GA, Jambor E, et al. (2014) Mass Spectrometric Identification of Ancient Proteins as Potential Molecular Biomarkers for a 2000-Year-Old Osteogenic Sarcoma. PLoS ONE 9(1): e87215. doi:10.1371/journal.pone.0087215
